# Supplementary material
Source: PubMed Central journal article supplement (PMC6390976)
Supplement: NIHMS1007465-supplement-06.pdf [file NIHMS1007465-supplement-06.pdf]

**A****Matrigel matrix,  
no added nanoparticles****HFF cells**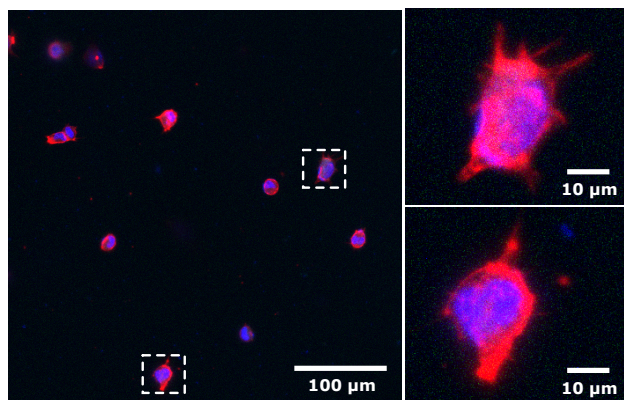**B****U87 cells**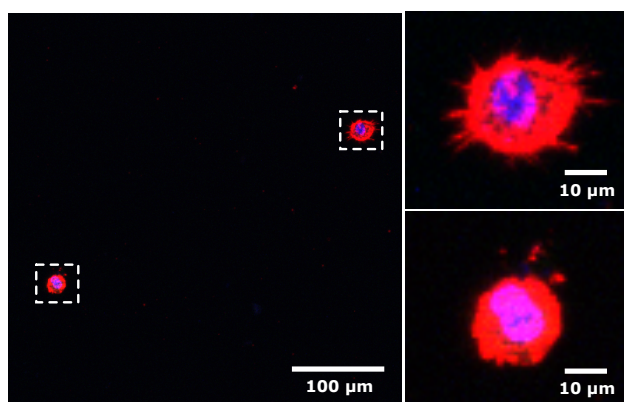**C****BSA-coated nanoparticles****Aligned**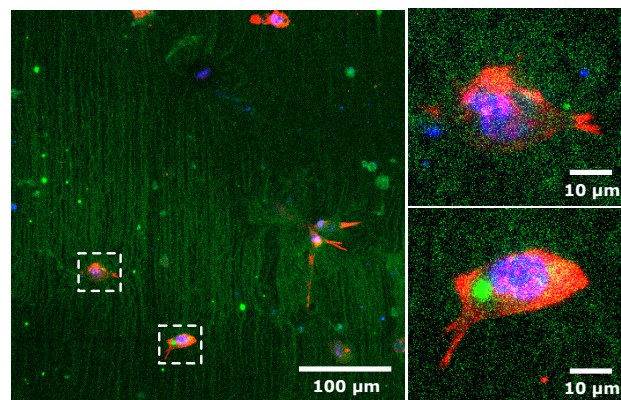**Unaligned**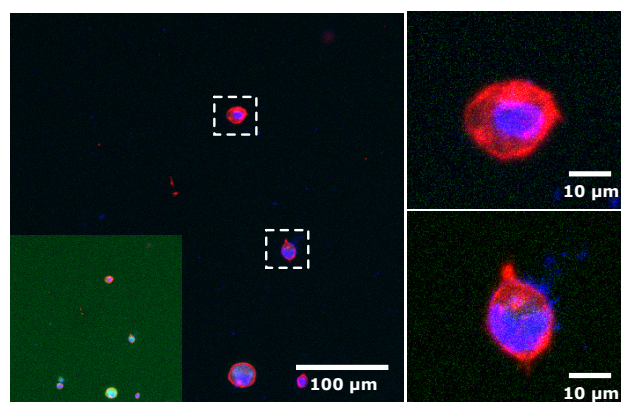**Protein-coated nanoparticles****F-actin****Nucleus****HFF cells****D****BSA-coated nanoparticles****3D, aligned matrix**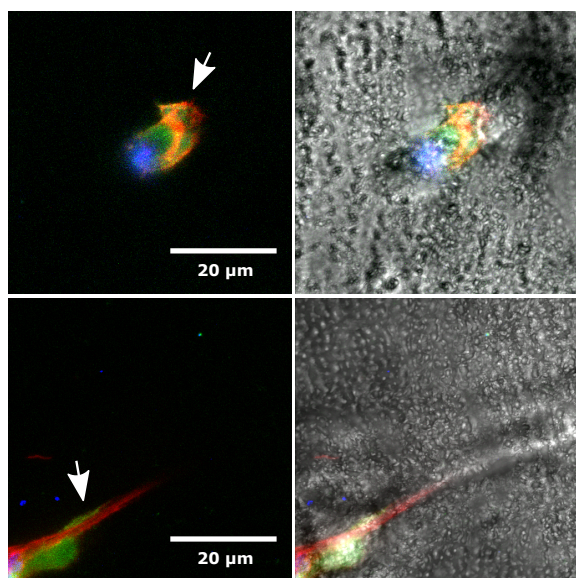**HFF cells****F-ctin****Paxillin****Nucleus**
