# Supplementary material
Source: PubMed Central journal article supplement (PMC6390976)

**A**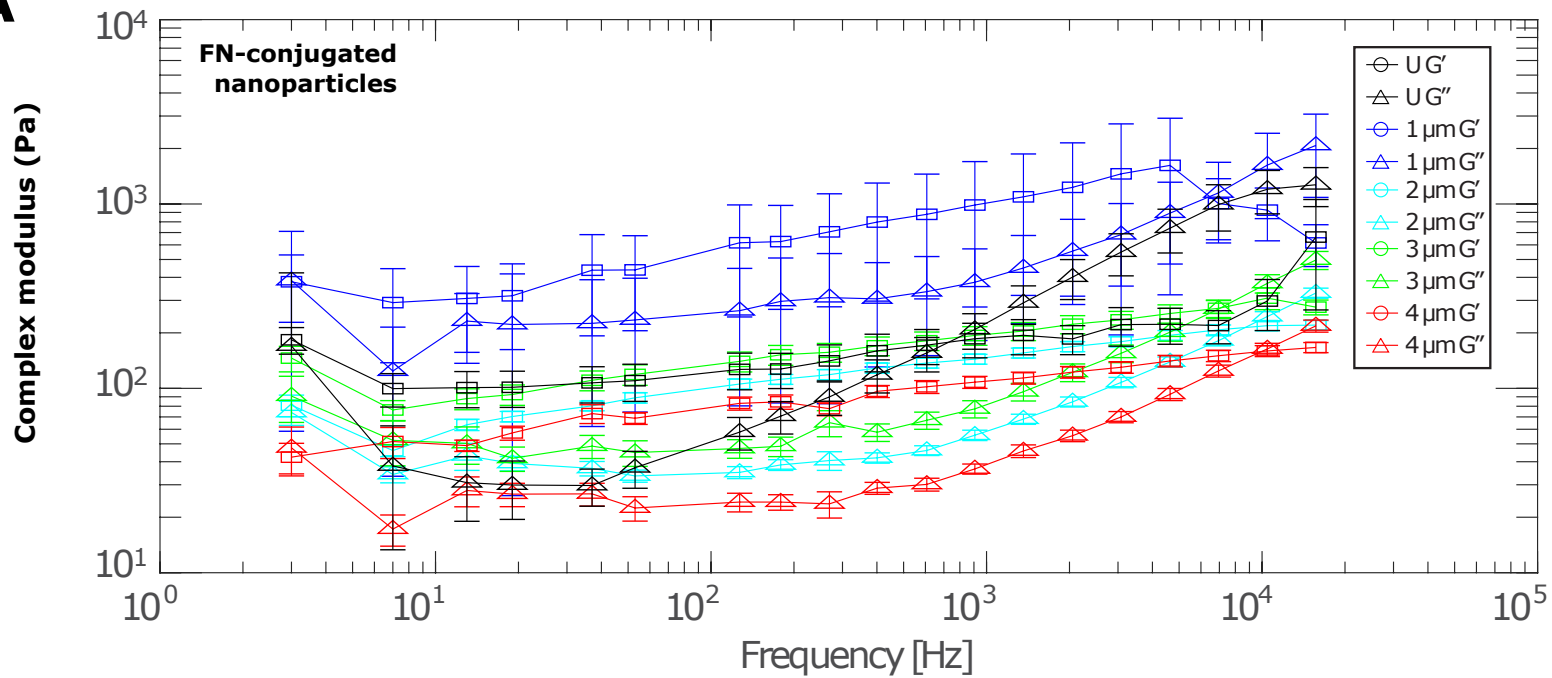**B**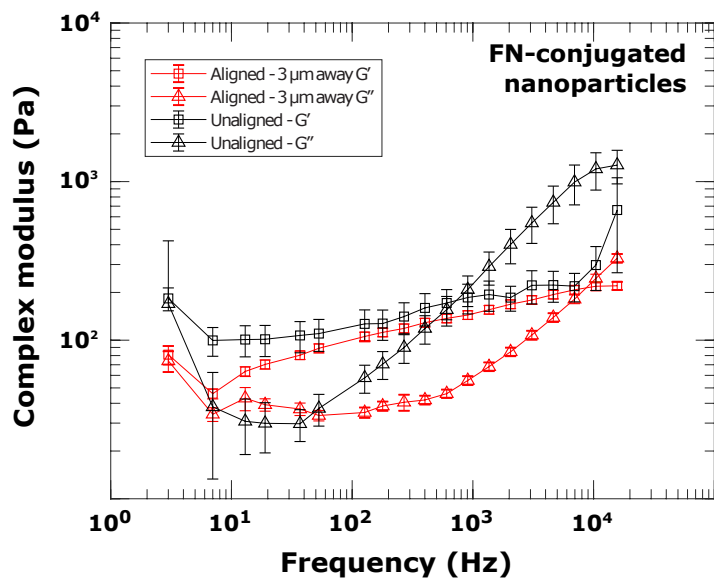

Supplement: NIHMS1007465-supplement-02.pdf [file NIHMS1007465-supplement-02.pdf]

**A**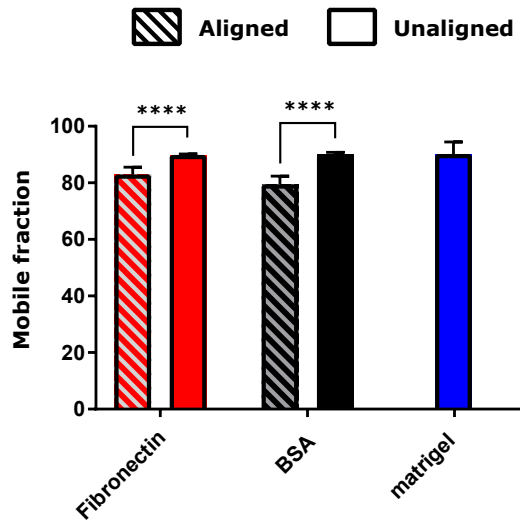**B**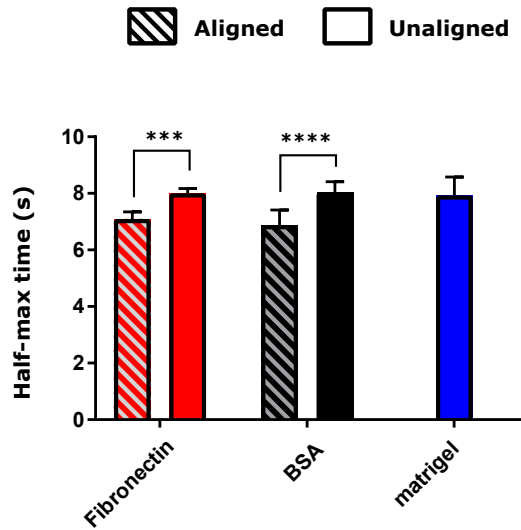

Supplement: NIHMS1007465-supplement-03.pdf [file NIHMS1007465-supplement-03.pdf]

**A**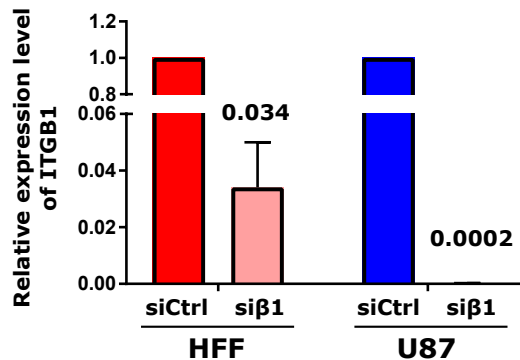**B**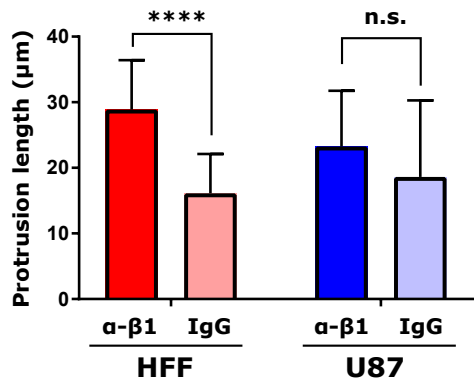**C**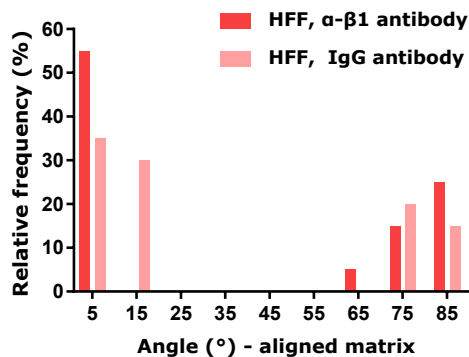**D**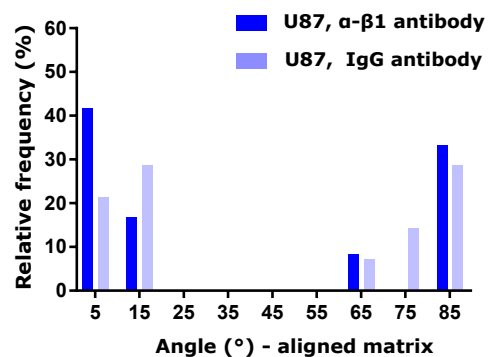

Supplement: NIHMS1007465-supplement-09.pdf [file NIHMS1007465-supplement-09.pdf]
